# Supplementary material
Source: PubMed Central journal article supplement (PMC5089710)

## A

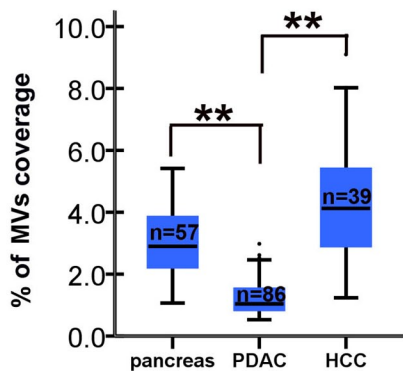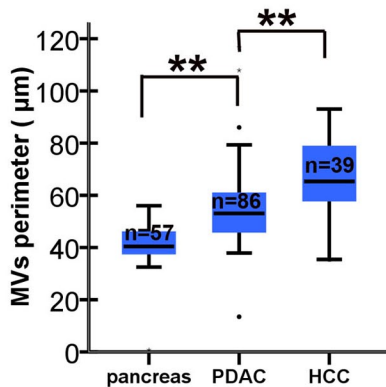

## B

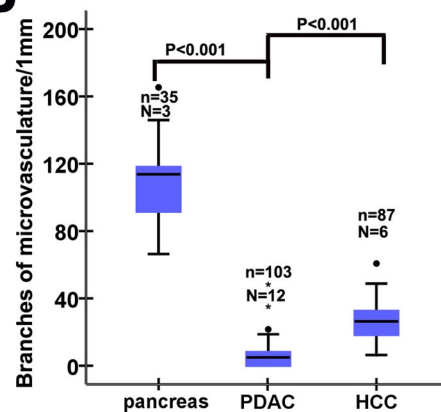

## C

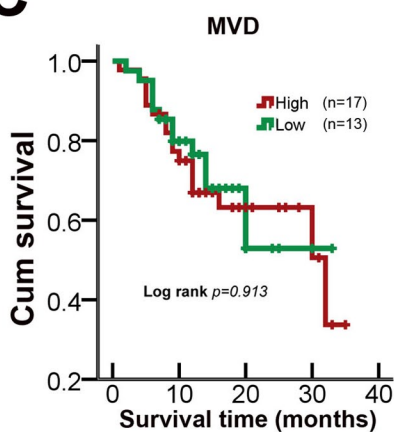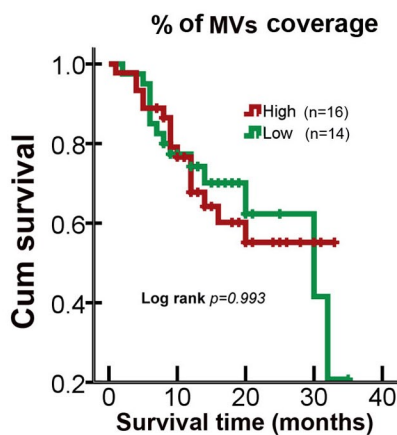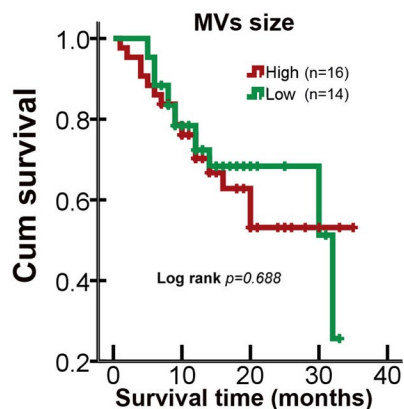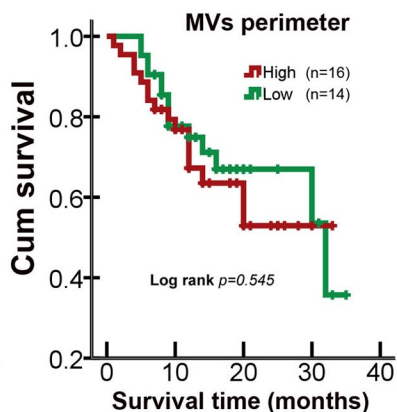

## D

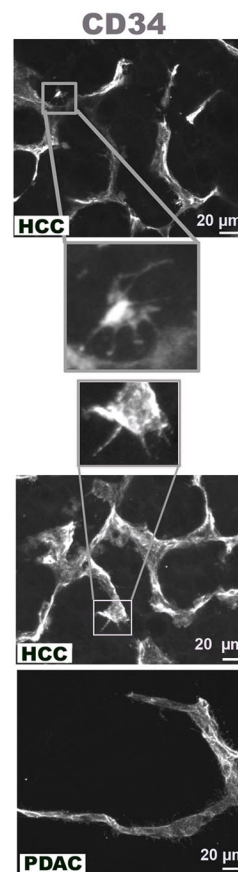

## A

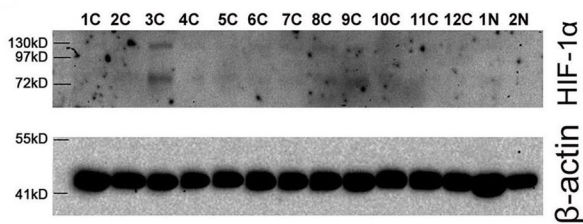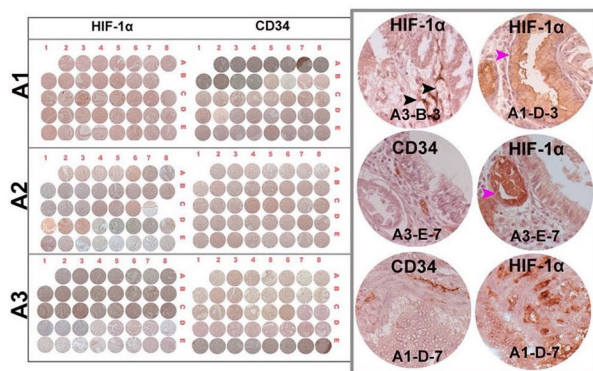

## B

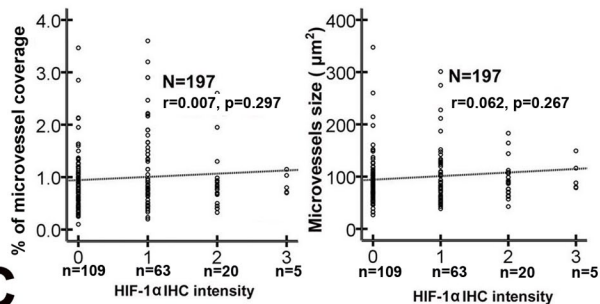

## C

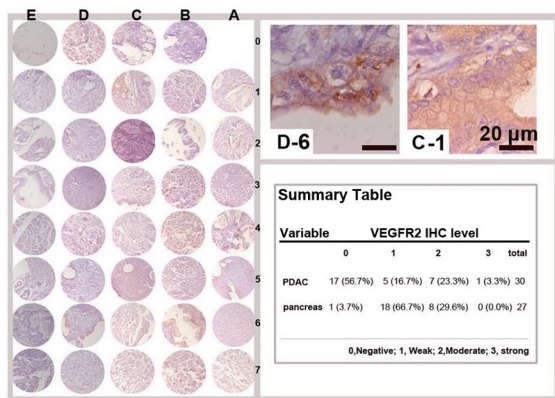

## D

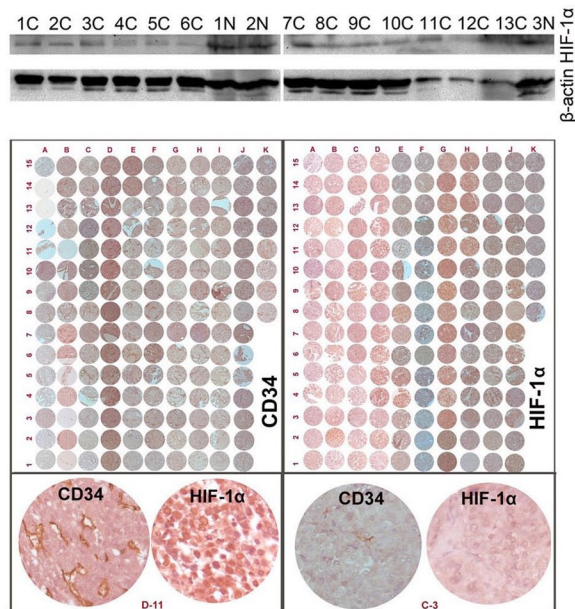

## E

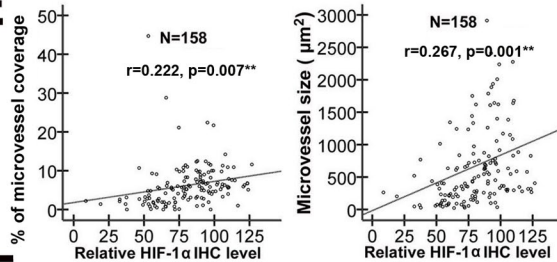

## F

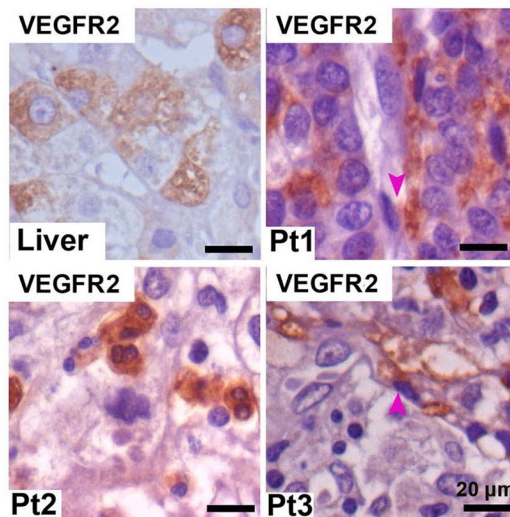

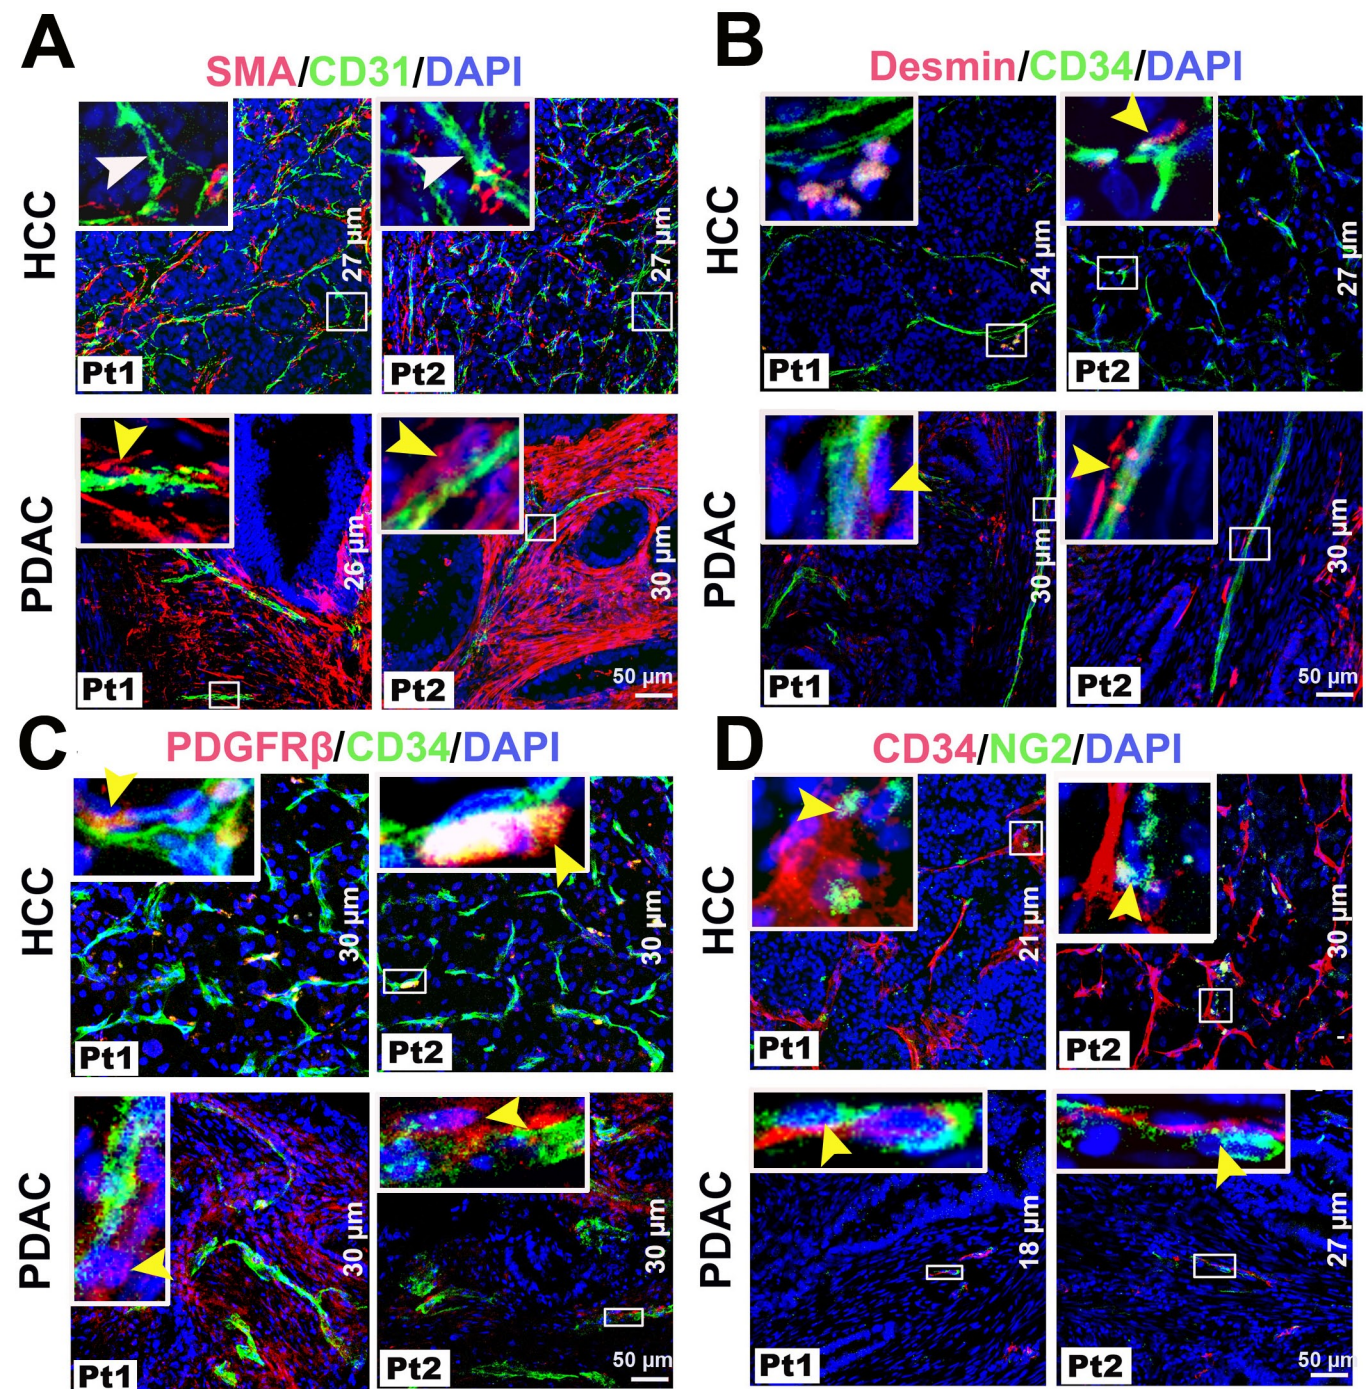

**A**

CD31

Collagen IV

CD31/Collagen IV/SMA

HCC

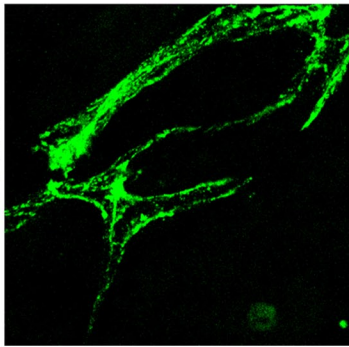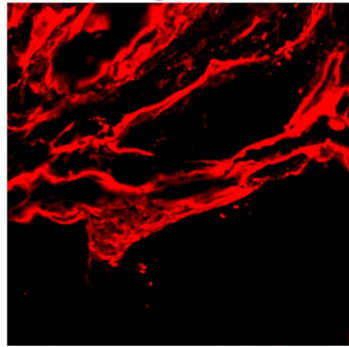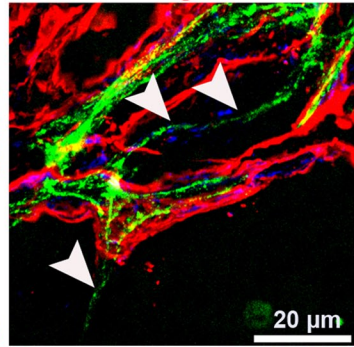

PDAC-i

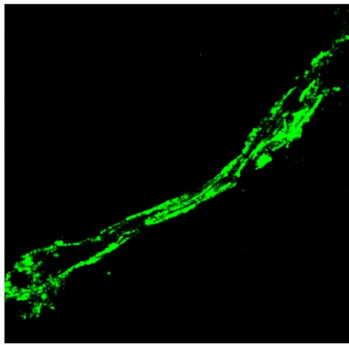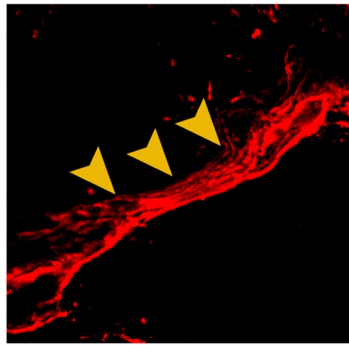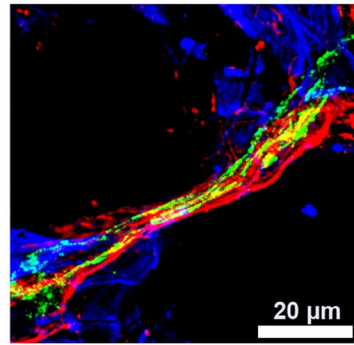

PDAC-ii

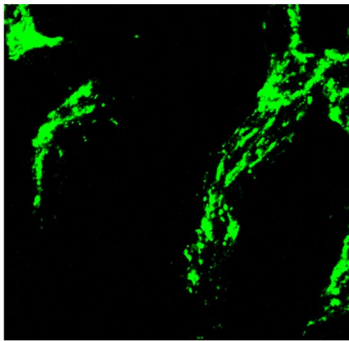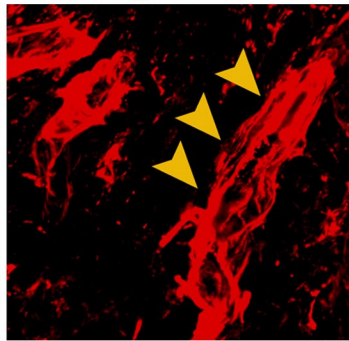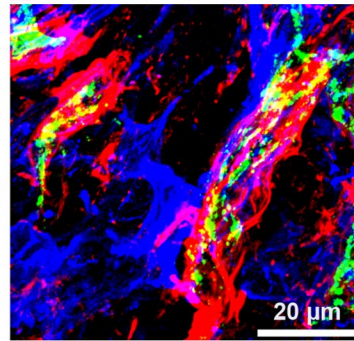**B**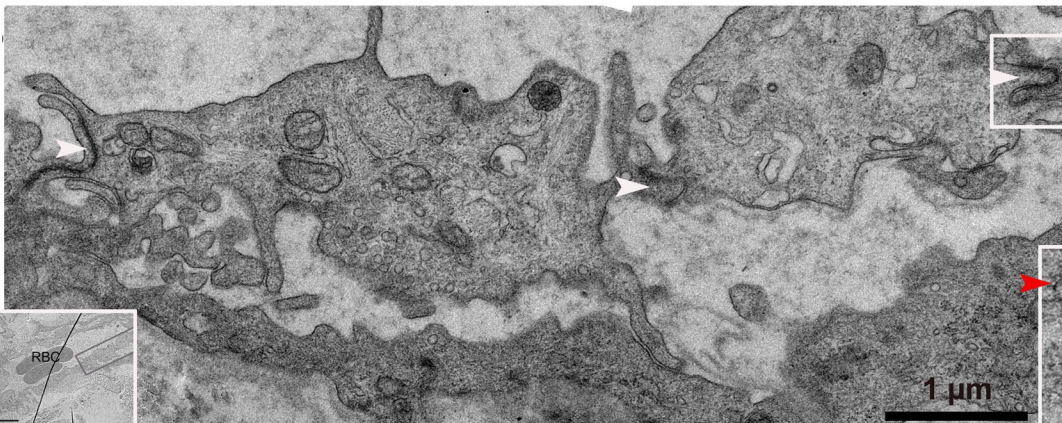

A

GLUT-1/CD34/DAPI

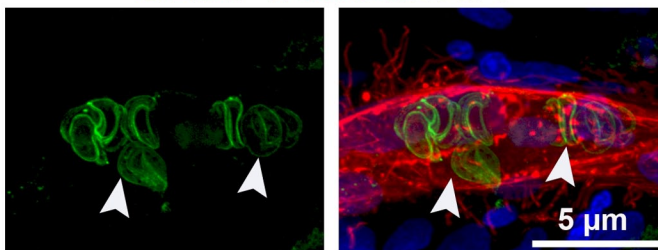

B

Phalloidin/CD34/DAPI

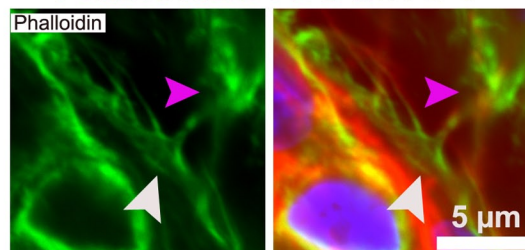

C

CD34/DAPI

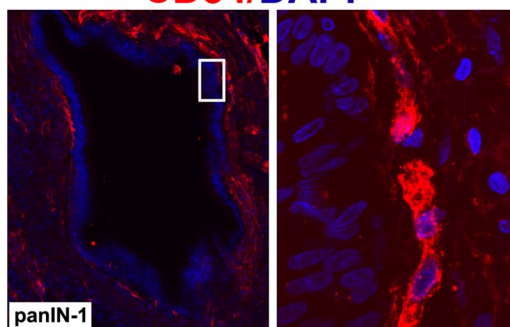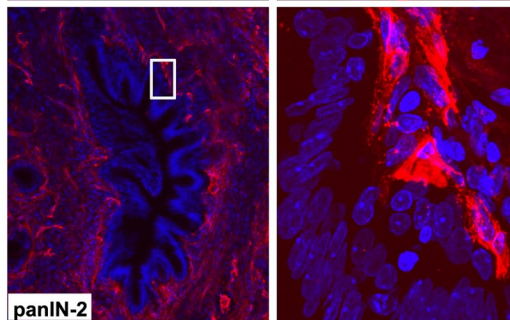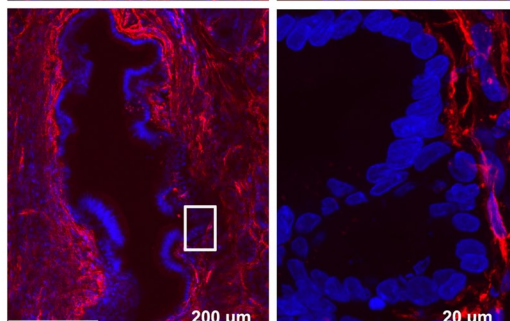

D CD34/GLUT-1/DAPI

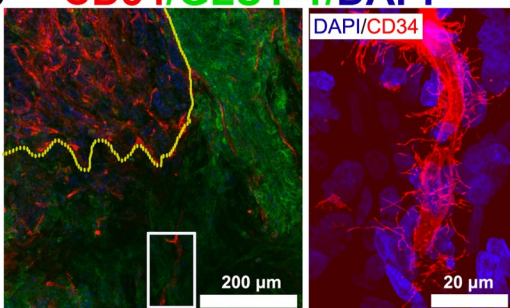

E

CD34

CD34/GLUT-1/DAPI

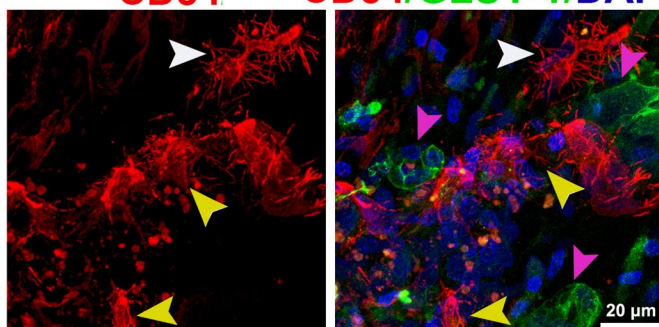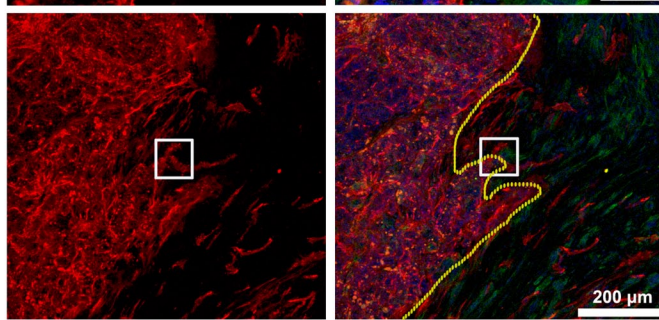

F

CD34

CD34/GLUT-1/DAPI

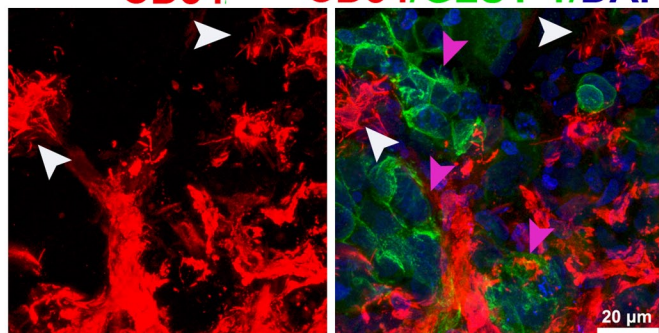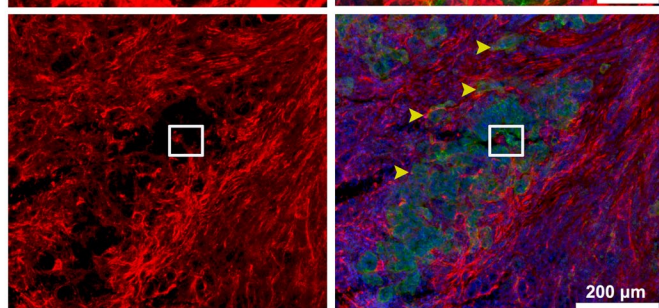

**A**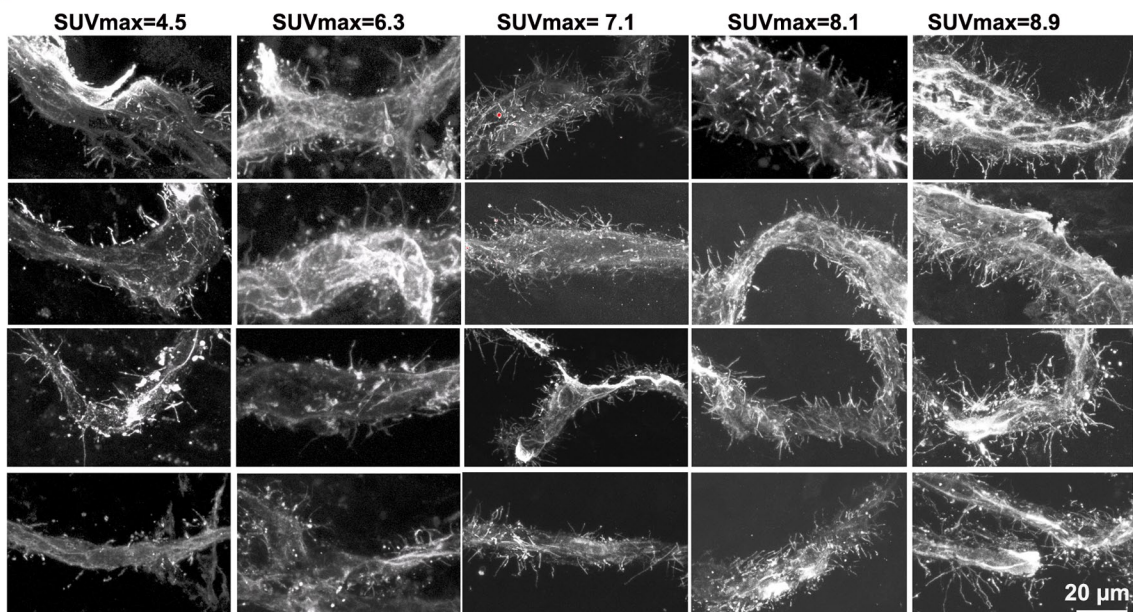**B**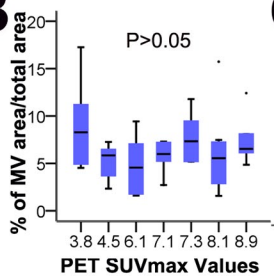**C**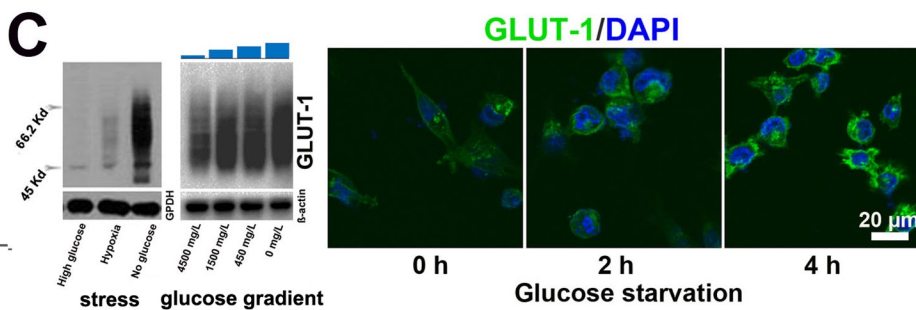**D**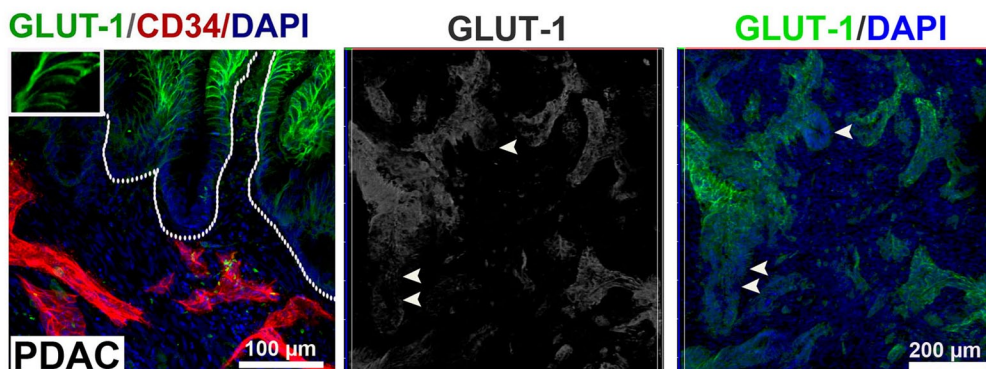**E**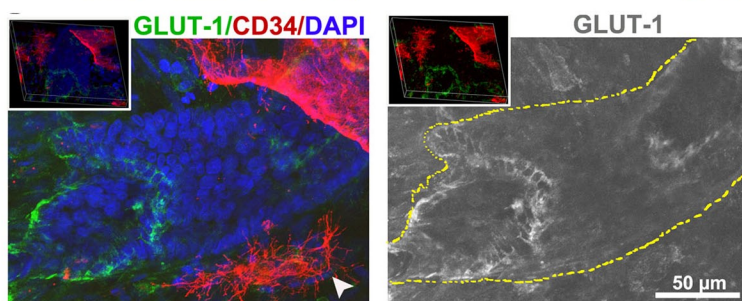**F**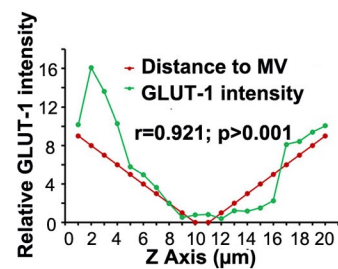

Supplement: NIHMS817000-supplement-Supp_Figure.pdf [file NIHMS817000-supplement-Supp_Figure.pdf]
